1 Fluorescence-based whole plant imaging and phenomics

2

3 Stephen B. Rigoulot<sup>1,4</sup>, Tayler M. Schimmel<sup>2,4</sup>, Jun Hyung Lee<sup>1,4</sup>, Holly Brabazon<sup>1,4,5</sup>, Kerry A.  
4 Meier<sup>1,4</sup>, Manuel J. Schmid<sup>1,4</sup>, Erin M. Seaberry<sup>1,4</sup>, Magen R. Poindexter<sup>1,4</sup>, Jessica S. Layton<sup>1,4</sup>,  
5 Jared W. Brabazon<sup>5</sup>, Jonathan A. Madajjan<sup>6</sup>, Michael J. Finander<sup>7</sup>, John DiBenedetto<sup>6</sup>,  
6 Alessandro Occhialini<sup>3,4</sup>, Scott C. Lenaghan<sup>3,4,\*</sup> and C. Neal Stewart, Jr<sup>1,4,\*</sup>

7

8 **Address:**

9 <sup>1</sup>Department of Plant Sciences, University of Tennessee, Knoxville, Tennessee 37996

10 <sup>2</sup>Department of Mechanical, Aerospace and Biomedical Engineering, University of Tennessee,  
11 Knoxville, Tennessee 37996

12 <sup>3</sup>Department of Food Science, University of Tennessee, Knoxville, Tennessee 37996

13 <sup>4</sup>Center for Agricultural Synthetic Biology (CASB), University of Tennessee Institute of  
14 Agriculture, Knoxville, Tennessee 37996

15 <sup>5</sup>Brabazon Apps, Knoxville, Tennessee, 37921

16 <sup>6</sup>Mission Support and Test Services Special Technology Laboratory, Santa Barbara, California  
17 93117

18 <sup>7</sup>Necsel IP Inc., 801 Ames Avenue, Milpitas, CA, USA 95035

19

20 \*Corresponding Authors

## 21 **Summary**

22 Reverse genetics approaches have revolutionized plant biology and agriculture. Phenomics has  
23 the prospect of bridging plant phenotypes with genes, including transgenes, to transform  
24 agricultural fields<sup>1</sup>. Genetically-encoded fluorescent proteins (FPs) have transformed studies in  
25 gene expression, protein trafficking, and plant physiology. While the first instance of plant  
26 canopy imaging of green fluorescent protein (GFP) was performed over 20 years ago<sup>2</sup>, modern  
27 phenomics has largely ignored fluorescence as a transgene indicator despite the burgeoning FP  
28 color palette currently available to biologists<sup>3-5</sup>. Here we show a new platform for standoff  
29 imaging of plant canopies expressing a wide variety of FP genes in leaves. The platform, the  
30 fluorescence-inducing laser projector (FILP), uses a low-noise camera to image a scene  
31 illuminated by compact diode lasers of various colors and emission filters to phenotype  
32 transgenic plants expressing multiple constitutive or inducible FPs. Of the 20 FPs screened, we  
33 selected the top performing candidates for standoff phenomics at  $\geq 3$  m using FILP in a  
34 laboratory-based laser range. Included in demonstrated applications is the performance of an  
35 osmotic stress-inducible synthetic promoter selected from a high throughput library screen.  
36 While FILP has unprecedented versatility as a laboratory platform, we envisage future iterations  
37 of the system for use in automated greenhouse or even drone-fielded versions of the platform for  
38 crop screening.

39

## 40 **Main paper**

41 Phenomics seeks to tightly connect genotype to phenotype across various environmental  
42 conditions<sup>1,6</sup>, which would enable translation of lab-based research to agricultural production and  
43 sustainability<sup>1,7</sup>. The various scales of phenotyping currently cover ranges from sub-  
44 micron/microscopic to satellite-based imaging of  $> 2000$  km, with tremendous disconnect  
45 between these scales. We posit that the ‘sweet spot’ to connect genes to phenotypes as well as  
46 genomes to phenomes—for both reductionistic-mechanistic levels and ecological levels—lies at  
47 the scope of the plant canopy (meters); currently there is a technological void at this range. At  
48 the microscopic level where most basic research takes place, studies assess cellular-to-  
49 subcellular activities using state-of-the-art microscopes and molecular probes, for which  
50 innovations are numerous<sup>3,8</sup>. At the whole-plant-to-field level of assessment, there is tremendous  
51 potential for detecting environmental stresses on crops. The chief problem with “small scale”

52 laboratory studies is that they are confined to tightly-controlled artificial conditions. Field  
53 experiments and radiometric models of vegetable remote sensing have the problem with long-  
54 range remote sensing is manifold: 1) ‘real-life’ systems generate data that is extremely noisy due  
55 to optical artifacts, 2) in complex environments<sup>9</sup> connecting robustly-measured phenomes to  
56 genes and genomes is tenuous<sup>1,6</sup>, 3) incomplete illumination causes partial percent-coverage and  
57 lower leaf-area-index 4) bidirectional effects, 5) sub-pixel mixing, and 6) spatial variability on  
58 the order of a square meter in the scene landscape<sup>10</sup>.

59 In plant biology and agriculture, the most useful optical signals would be those that are  
60 completely unambiguous and occupying distinct spectral wavelengths from endogenous plant  
61 molecules. Leaf-produced compounds such as alkaloids, terpenoids, and chlorophyll produce  
62 sizable spectral ‘noise’ in plants in the form of autofluorescence<sup>11</sup>. In addition to avoiding  
63 spectral noise, heterologous signals should be directly tied to traits and genes. Indeed, a  
64 collection of these “ideal” spectral signatures could be stacked for multispectral signaling to  
65 expand the diversity of applications. FPs fit these criteria and can be universally imaged in plant  
66 organs. Certainly, canopy-level FP imaging is facile for UV-excitable FPs such as (near)  
67 wildtype GFP<sup>12</sup> and recently-characterized GFP variants, such as those expressed in ornamental  
68 plants<sup>13</sup>. UV-excitable GFP can be easily imaged at the sub-meter level, e.g., seedlings and small  
69 canopies, because emission filters are not required and GFP fluorescence may be seen in the  
70 dark<sup>5</sup>. Previously, researchers have developed an inexpensive imaging system using blue LED  
71 arrays to excite GFP engineered into *Arabidopsis*<sup>14</sup>, in which dichroic filter cubes were coupled  
72 with an inexpensive camera, which could image cm-scale seedling ‘canopies.’ At the other end  
73 of the cost spectrum a portable laser-induced fluorescence imaging (LIFI) system containing a  
74 tripled Nd:YAG laser (355 nm) has been used to excite UV-excitable GFP in plants at a standoff  
75 (3 m), but this instrument was very expensive and was limited to UV-excitation because FPs  
76 excitable at 532nm were not available<sup>10</sup>. In order to move to higher efficiency light sources and  
77 multiple wavelengths, non-imaging techniques were explored to frequency modulate 405nm  
78 laser diodes and a fluorescence spectrometer was used to detect materials at distances greater  
79 than 2 km in field experiments with a 1 m spot size<sup>15,16</sup>. All current remote FP-imaging systems  
80 currently available lack flexibility with regards to imaging a variety of FPs and cannot  
81 simultaneously image multiple FPs in multiple plants at the canopy level.

82 Here we show the performance of a relatively inexpensive custom device (< \$50,000  
83 USD), FILP, that images plant canopies expressing various FPs at > 3 m in a laboratory setting  
84 in both constitutive and induced modalities. The flexibility of the instrument lies in the ability to  
85 select laser diodes for FP excitation and custom filters for filtering emission. Violet (400 nm),  
86 blue (465 nm) and green lasers (524 nm) were chosen in the test system to excite a range of FPs  
87 across a wide color palette (Figure 1). This laser beam is then homogenized to produce an  
88 illumination pattern that is highly uniform (flat and smooth), giving the system greater spatial  
89 resolution. Emission filters, housed in an automated filter wheel, were specifically chosen to  
90 prevent crosstalk between multiple FPs. The final major component of the system was a  
91 laboratory-grade digital camera that enabled the capture of high-resolution whole plant images.  
92 As designed, the system allows modular substitution of both diode lasers and emission filters to  
93 customize imaging of fluorescent signatures in plants, which can be accomplished at the end-user  
94 level. The goal of our study was to conduct near-simultaneous imaging of multiple, spectrally-  
95 distinct FPs at the whole canopy level in plants as a new modality of plant phenomics.

96 To determine the flexibility of the FILP system, 20 FPs were characterized in  
97 agroinfiltrated *Nicotiana benthamiana*. The inherent FP excitation peaks ranged from UV (395  
98 nm) to orange (578 nm) with emission peaks from blue (454 nm) to red (611 nm) (Table 1). The  
99 FPs also had a wide range of extinction coefficients, quantum yields and other diverse features,  
100 e.g., oligomerization states and localization tags to allow for a plethora of multi-spectral imaging  
101 schemes in plants (Table 1). Each of these FP genes were placed under the control of constitutive  
102 doubled 35S promoter in a common vector<sup>17</sup> and expressed in *N. benthamiana* using either  
103 whole plant or whole leaf vacuum-agroinfiltration. Given the range of FP characteristics, many  
104 of which were suboptimal for the initial laser diodes and emission filters chosen for FILP, we  
105 were surprised that all FPs could be imaged in the plant canopies (Supplementary Figure 1).  
106 Owing to these suboptimal excitation and emission matches (FPs vs. FILP), in some cases,  
107 coupled with differences in relative brightness of FPs, there was a four-fold difference between  
108 power requirements for imaging among FPs in plants and the respective imaging channels  
109 (Supplementary Table 1). Fluorescence imaging was complemented by on-the-plant fluorescence  
110 spectroscopy measurements that modeled the three laser excitation frequencies (Supplementary  
111 Table 1). The heatmap from fluorescence spectroscopy data as well as signal-to-noise ratios of  
112 each FP emission peak, relative to a buffer infiltrated control excited at the same wavelength,

113 was congruent with imaging results (Supplementary Table 1). Therefore, all FPs produced in  
114 plants showed similar patterns of detection via FILP consistent with quantitative fluorescence  
115 measurements.

116 Of the 20 FPs initially screened, four of these were selected as top performers with  
117 regards to stacking and/or imaging together in canopies: mTagBFP2, mEmerald, TurboRFP and  
118 mScarlet-I (Figures 2 and 3). Multiple-FP phenomics could enable complex trait analysis.  
119 Therefore, we chose FP emissions in four distinct color bands and specific FPs that were  
120 consistently brighter than others in those color bands. Among color bands, blue-emitters seem to  
121 be the most depauperate. When designing FILP components, we purposefully matched the laser  
122 and emission filter to the optimal blue fluorescence protein spectra of mTagBFP2 (Figure 1 and  
123 Table 1). Nonetheless, both mTagBFP2 and mTurquoise could be imaged in plants using the  
124 same laser/filter combination (Figure 2 and Supplementary Figure 1). Other potential top  
125 performing FPs included both yPet and PhiYFP (Supplementary Figure 1), which would be very  
126 good choices for single FP reporters, but their emission spectra overlapped with both green and  
127 orange emitters in the 525/50 nm and 575/40 nm emission filters, which prohibited their use for  
128 simultaneous co-expression with other FPs. Top performers were also selected based on their  
129 emission peaks which were aptly spaced across the visible spectrum to facilitate robust  
130 combinatorial detection pairs. mTagBFP2 or mEmerald paired with TurboRFP or mScarlet-I  
131 were easily differentiated by FILP (Figure 2). One potential concern in imaging multiplexed FPs  
132 in the same plant cells was Förster (or fluorescence) resonance energy transfer (FRET)<sup>18</sup>. FRET  
133 occurs when one FP emits at the same spectrum that excites a second FP, which could potentially  
134 make dual FP detection ambiguous and confounding within the same plant. Therefore, we tested  
135 for evidence of FRET prior to selection of the four color band ‘winners’ by fluorescence  
136 spectroscopy. We observed no detectable second emission peak in the spectrophotometric  
137 measurements taken on any two co-expressed FP combinations; i.e., no FRET in our agro-  
138 infiltrated samples (Supplementary Figure 2). The initial FILP components were selected to  
139 allow for capture of optimal FP emission spectra. However, optimization of the laser light source  
140 has been facile to excite most the FPs tested using a small fraction of the total laser power  
141 available in the system. Further optimization of the emission filters may allow for the  
142 simultaneous visualization of combinations greater than two FPs per plant. In no cases did we

143 observe any apparent laser-light damage to leaf tissues or other undesirable phenotypes when  
144 imaging plants in the FILP system.

145 The FILP system was conceived of and constructed as a phenomics device first to study  
146 plant inducibility to stresses. As an example of an ongoing study on the construction and  
147 screening of a synthetic promoter library for plants, we discovered an osmotic stress-inducible  
148 promoter in a potato protoplast screen and subsequently used FILP phenotyping to understand  
149 the promoter inducibility patterns in time and under several stimuli. Shown here is the result of  
150 one synthetic promoter (JL1) that is induced by osmotic stress (Figure 3). Five days-post osmotic  
151 stress treatment, strong inducible GFP expression could be detected in *N. benthamiana* canopies  
152 relative to control treatments. Thus, these data can be used as a first-order approximation of  
153 stand-off inducible detection in a plant model relevant to Solanaceae crops.

154 As plant systems biology continues to mature, arguably, phenomics may have a difficult  
155 time keeping pace with other –omics developments. One specific subset of applications of FILP-  
156 enabled phenotyping is the detection of phytosensors, which are plants engineered to detect and  
157 report environmental stimuli<sup>19</sup>. Phytosensors have been developed to monitor plant pathogenic  
158 bacteria to the level of field-testing<sup>20</sup>, but the production of clear and useful photonic signals  
159 remains challenging. In combination with advanced synthetic biology in plants<sup>21</sup>, especially in  
160 the area of synthetic promoters<sup>22</sup> and circuits<sup>23</sup>, we are poised to enter the ‘golden era’ of gene-  
161 targeted phenomics. Arguably, abiotic stress detection, e.g., osmotic stress, at an early onset  
162 stage has the potential to revolutionize agricultural productivity and sustainability<sup>24</sup>. Our study  
163 represents the first demonstration of a ‘turn-key’ system of an osmotic stress phytosensor that  
164 can be detected optically at a stand-off. Moreover, the versatility of standoff detection using the  
165 suite of the FP color palette and the FILP phenotyping system represents an unprecedented  
166 application that clearly demonstrates the potential of FP-based phenomics in agriculture.

167

## 168 **Methods**

169 **Fluorescence-inducing laser projector phenotyping system.** The fluorescence-inducing laser  
170 projector (FILP) is a custom-designed instrument primarily composed of components purchased  
171 from Necsel IP, Inc. (Milpitas, CA). The Necsel components include a custom NovaLum module  
172 with three laser diodes, each emitting, respectively at 400 nm, 465 nm, and 523 nm, a Thermal  
173 Platform Developer’s Kit, an intelligent controller kit, and a homogenizing square core fiber

174 (400  $\mu\text{m}$ , 0.22 NA) used for flattening the Gaussian image produced by the lasers into a spatially  
175 uniform flat-field, albeit with residual speckle from the laser coherence. This speckle was  
176 reduced by passing the fiber through a commercially-available aquarium pump to vibrate the  
177 fiber faster than the camera's exposure time, thereby smoothing and de-speckling the resulting  
178 image. Individual amplified spontaneous emission (ASE) filters were hand cut and mounted onto  
179 each laser diode to limit the transmitted wavelength. As such, a  $405 \pm 20$  nm filter (ZET405/20X,  
180 Chroma Technology Corp., Bellow Falls, VT) was mounted onto the 400 nm diode, a  $460 \pm 36$   
181 nm filter (ET465/36 nm, Chroma Technology Corp.) was mounted onto the 465 nm diode, and a  
182  $524 \pm 24$  nm (FF01-524/24, IDEX Health & Science, LLC., Rochester, NY) was mounted onto  
183 the 523 nm diode. After assembly, the maximum power output of the complete Necsnel system  
184 was 1.14 W @ 400 nm, 1.36 W @ 465 nm, and 1.45 W @ 523 nm. Further, control of the  
185 current (from the intelligent controller) allowed linear control over the laser power with  $R^2$   
186 values  $> 0.99$  (Supplementary Figure 3). To shape the beam for imaging whole plants, a  
187 projector lens (63-714, Edmund Optics, Barrington, NJ) was placed 6 mm in front of the  
188 homogenizing fiber to form a  $20 \text{ cm}^2$  imaging square at a distance of 3 m.

189 Images of plants at  $\geq 3$  m was achieved using an Andor Zyla 5.5 sCMOS camera  
190 equipped with a 50 mm focal length lens (86-574, Edmund Optics). The camera was mounted to  
191 the same breadboard as the laser system, ensuring that the excitation and emission distances were  
192 identical. Control of the camera resolution, exposure time, and image acquisition was achieved  
193 using the free open-source software  $\mu\text{Manager}$ . A five-position motorized filter wheel with USB  
194 control (84-889, Edmund Optics) was mounted between the camera lens and the sample to  
195 enable collection of images for specific wavelengths pertaining to the target fluorescent protein  
196 synthesized by plants. In the current version of FILP, three 50 mm emission filters were loaded  
197 onto the emission wheel:  $460 \pm 50$  nm (ET460/50 nm),  $525 \pm 50$  nm (ET525/50 nm), and  $575 \pm$   
198  $40$  nm (ET575/40 nm) (Chroma Technology Corp.).

199 To ensure user safety of the system and provide complete darkness for sampling, a  
200 custom laser range, 0.61 m x 0.91 m x 3.7 m, was assembled around the entire system using 25  
201 mm construction rails and black hardboard (XE25 & TB4, ThorLabs, Newton, NJ). Plants were  
202 placed inside the enclosure through a door fabricated at the back of the enclosure using the same  
203 materials. Finally, a magnetic interlock was used to ensure that the class IV lasers could be



204 operated as a class I system where the lasers were immediately and automatically turned-off if  
205 the door was opened.

206

207 **Plant expression vectors for constitutive expression of fluorescent protein genes.** The DNA  
208 coding sequences for the 20 fluorescent protein (FP) genes listed in Table 1 were mobilized into  
209 Invitrogen pENTR /D-TOPO cloning vectors (Invitrogen, Carlsbad, CA). Following colony PCR  
210 and validation by sequencing, the FP coding sequences were each recombined into pMDC32 35S  
211 expression vectors<sup>17</sup> via the LR Clonase reaction (Invitrogen, Carlsbad, CA). FPs were  
212 subsequently re-sequenced prior to transformation into *Agrobacterium tumefaciens* strain  
213 LBA4404.

214

215 **Synthetic promoter screening.** To identify candidate osmotic-stress inducible plant promoters,  
216 a library of synthetic promoters, totaling > 2000 constructs, was screened in potato protoplasts  
217 (Stewart et al., unpublished data). Transformed protoplasts were observed for GFP expression  
218 using an EVOS M7000 imaging system (ThermoFisher Scientific, Waltham, MA) equipped with  
219 a GFP filter (excitation: 470/22 nm, emission: 510/42 nm), and protoplasts were scored as  
220 positive or negative for induction. Promoters identified in the protoplast screen were then  
221 characterized in leaves by agroinfiltration assays in *N. benthamiana*.

222 For the osmotic stress treatment, each pot was watered with 100 ml of NaCl solution (250  
223 mM) 48 hr after agroinfiltration, followed by withholding water for 5 d to partial wilt stage. The  
224 mock treatment consisted of 100 ml tap water applied every two days to each plant. Three  
225 biological replicates were used, and the experiments were repeated three times. Fluorescence  
226 spectroscopy measurements were taken immediately prior to NaCl treatment and then repeated  
227 every day for 5 d. FILP images were taken on the final day of the experiment. Leaves not  
228 previously measured by the fluorescence spectrometer were removed, including old leaves and  
229 new growth that had arisen since vacuum infiltration. The mEmerald reporter was excited using  
230 the 400 nm laser diode and observed using the 525/50 nm filter. Laser wattage was 0.8 W and  
231 the exposure time was 150 ms.

232

233 **Vacuum agroinfiltration of *N. benthamiana*.** *Agrobacterium* was infiltrated according to  
234 Rigoulot et. al. (2019)<sup>25</sup> with modification. *Agrobacterium tumefaciens* strain LBA4404 was



235 used for the infiltration of all fluorescent protein constructs. Colony PCR was used to determine  
236 transformation of *Agrobacterium*. *Agrobacterium* was then grown from colonies overnight in 10  
237 ml YEP media with rifampicin (50 mg/L) and kanamycin (50 mg/L) selection at 28°C shaking.  
238 This culture was used as the seed culture for a 125 ml culture also grown overnight under the  
239 same conditions. *Agrobacterium* was resuspended in injection media (10 mM MES, 10 mM  
240 MgCl<sub>2</sub> and 100 μM acetosyringone) to an OD600 value of 0.8 and this *Agrobacterium* solution  
241 was incubated for 3 hr at room temperature prior to infiltration. Four-week-old *N. benthamiana*  
242 plants grown under long day conditions at 23°C were used for infiltration experiments. Vacuum  
243 infiltration of *N. benthamiana* plants were performed using a modified Nalgene vacuum  
244 desiccator (Cole Parmer, Vernon Hills, IL). The sidearm on the base was blocked using the  
245 PTFE cap (provided with purchase) and secured in place with parafilm. The stopcock on the  
246 desiccator lid was removed and PVC tubing was retro-fitted with a 1-5 ml pipette tip to connect  
247 the benchtop vacuum port with the vacuum desiccator. *N. benthamiana* plants were inverted and  
248 all aboveground tissues were submerged into a Magenta™ Ga-7 Plant Culture Box (Fisher  
249 Scientific, Catalog No. 50-255-176) filled with the *Agrobacterium* suspension. The Magenta box  
250 was housed inside of a Styrofoam support ring that was cut to the size of a large glass container  
251 to prevent the movement of the vessel during application and release of the vacuum. With the  
252 modified pipette tip end of the hose securely inserted into the vacuum desiccator lid, the vacuum  
253 was applied in 1 min intervals. This was repeated 3 times to achieve thorough infiltration of leaf  
254 tissue indicated by visible saturation of the leaf with the *Agrobacterium* solution. The vacuum  
255 provided by the benchtop vacuum port was measured to be -84 kpa or -12 psi. After infiltration,  
256 the plants were rinsed in a beaker of DI water and then allowed to dry at room temperature  
257 (Supplementary Video 1). The plants were then returned to the growth room until fluorolog  
258 readings, FILP and confocal imaging were taken 72 hr post infiltration.

259 For co-infiltrated plants, *Agrobacterium* solution was adjusted for both FP gene  
260 constructs to an OD600 of 1.6, then FP constructs were mixed 1:1 and vacuum infiltration was  
261 conducted as previously described. Syringe infiltration of *N. benthamiana* leaves was conducted  
262 as described in Rigoulot *et al.* (2019)<sup>25</sup> with *Agrobacterium* solution at an OD600 of 0.8.

263

264 **Fluorescence spectroscopy of leaves.** Prior to FILP measurements, the targeted spectral  
265 characteristics of the youngest, fully-expanded leaf of each plant was quantified using scanning

266 fluorescence spectroscopy (Fluorolog®-3, obin Yvon and Glen Spectra, Edison, NJ, USA) using  
267 emission spectral acquisition by the FluorEssence Software (HORIBA Scientific, version  
268 3.8.0.60). On-the-leaf fluorescence was measured using a fiber optic probe as described  
269 previously<sup>26</sup>. Excitation wavelengths matched Necsul laser diode wavelengths at 400 nm, 465  
270 nm, and 523 nm with a slit width of 5 nm. Emission wavelengths were scanned from 415-615  
271 nm, 480-615 nm, and 540-615 nm for the respective excitation wavelengths in increments of 1  
272 nm. Leaves of the same developmental age were infiltrated with buffer as a negative control and  
273 measured for background fluorescence.

274 Fluorescence spectroscopy data was handled using custom software: the Fluorologger  
275 Shiny app, coded in R<sup>27,28</sup>. The graphic user interface allows for the visualization and  
276 normalization of fluorolog data and the app is currently available on github at  
277 [github.com/jaredbrabazon/Fluorologger](https://github.com/jaredbrabazon/Fluorologger). Output files from the Fluorolog (.dat format) were input  
278 into the application and with user input the data were normalized according to methods described  
279 in Millwood et al. (2003)<sup>26</sup>. A detailed user guide is available at the link provided.

280 The heatmap in Supplementary Table 1 was created by recording the fold change  
281 difference between an individual fluorescent proteins peak emission as described on FPBase.org  
282 and the background emission at this same point taken by the fluorolog (signal to noise).

283  
284 **Confocal microscopy.** The same leaf tissue analyzed by fluorescence spectroscopy (Fluorolog)  
285 was imaged using an Olympus FV1200 confocal microscope (Olympus, Center Valley, PA,  
286 USA). Diodes lasers (405, 440, 473, 559 and 635-nm lasers) along with conventional Argon and  
287 HeNe (R) lasers were used to image the investigated fluorescent proteins with excitation (Ex)  
288 and emission (Em) spectra indicated in Table 1. Single confocal images are shown in the  
289 manuscript. The manufacturer's Olympus FV10-ASW Viewer software Ver.4.2a (Olympus,  
290 Center Valley, PA, USA) and the ImageJ<sup>27</sup> analysis software (version 1.41o) were used to  
291 acquire and process confocal images, respectively.

292  
293 **Image processing.** Assembly of FILP and confocal microscope images was done using the  
294 ImageJ<sup>27</sup> analysis software (version 1.41o). Color determination for each fluorescent protein was  
295 done using the Wolfram Demonstration Project (<https://demonstrations.wolfram.com/>), Colors of  
296 the Visible Spectrum plugin. Using the Adobe color space option, peak emission wavelengths

297 were used to query for RGB values. These values, representing a percentage, were multiplied by  
298 the maximum value for the R,G or B decimal code (255). The resulting values were then used to  
299 establish look up tables (LUT) for the ImageJ<sup>29</sup> software. Images are input into the ImageJ  
300 software independently. Adjustments to brightness and contrast were applied uniformly across  
301 images if necessary. Using the images to stack function, FILP or confocal fluorescent and bright  
302 field (BF) images were overlaid. After using the composite image function and selecting the  
303 color option of the channels tool, pseudo coloring is applied to a selected image. Presets include  
304 the gray which can be used for the brightfield image as well as blue, green, red, etc. For more  
305 specific color palettes, a unique LUT was generated. By default, ImageJ applies different colors  
306 to the different channels (images) and these were changed using the channels tool color option.  
307 Images were exported as .tiff files for the construction of figures. We provide an example of the  
308 Wolfram player determination of R, G, B values, the conversion of these values to generate  
309 individual LUTs, the table of RGB decimal values for all FPs and a visual walkthrough of  
310 pseudo coloring (Supplementary Figure 4).

311  
312 **Preparation of potato cell suspension.** The preparation of potato cell suspension used for  
313 synthetic promoter screening of protoplasts was adapted from a previously described method by  
314 Sajid and Aftab (2016)<sup>30</sup>. *Solanum tuberosum* cv. ‘Desireé’ was propagated by nodal explants  
315 into propagation media [4.33g/L MS salts (Phytotech M524, PhytoTech Labs, Lenexa, KS), 25  
316 g/L sucrose, 100 mg/L myo-inositol, 0.17 g/L sodium phosphate monobasic, 0.44 g/L calcium  
317 chloride dihydrate, 0.4 mg/L thiamine HCL, 5 ml/L “complete vitamin stock” (for 100 ml; 40 mg  
318 glycine, 10 mg nicotinic acid, 10 mg pyridoxine HCL, 10 mg thiamine HCL), 3 g/L phytigel, pH  
319 5.8, 1 ml/L MS (Phytotech M557) vitamins) in Magenta GA7 vessels under 16-h day, 8-h night  
320 fluorescent light conditions at room temperature (23°C). Sterile leaf explants, cut into 1-2 cm  
321 squares, were taken from propagates and callus was induced on callus induction (CI) media [4.33  
322 g/L MS salts, 20 g/L sucrose, 2 g/L gelzan (solid media), pH 5.8, 1 ml/L MS vitamins, 4 mg/L  
323 2,4-D (2,4-dichlorophenoxyacetic acid)]. Callus was transferred to fresh CI plates every 2-3  
324 weeks. After 4-5 weeks on CI media, approximately 2 g of green, friable callus was used to  
325 inoculate 20 ml of liquid CI media and grown on a platform shaker at 120-140 rpm for 7 d. The  
326 suspension was then filtered through a 425 µm sieve and transferred to a new 125 ml flask. After  
327 the filtered cells settled, 15 ml of liquid CI media was removed, replenished with fresh CI media

328 and the suspension was grown again on a platform shaker at 120-140 rpm. After 7 d, an  
329 additional 30 ml of fresh liquid CI media was added to the flask and allowed to grow for another  
330 week. The cell suspension was maintained every 5-7 d by sub-culturing approximately 15 ml of  
331 the filtered suspension culture into 30 ml of fresh media. Cells were periodically filtered through  
332 a 425 $\mu$ m sieve to maintain consistency.

333  
334 **Protoplast transfection.** Potato protoplasts were isolated from cell suspension culture 3 d post-  
335 subculture. Five milliliters of packed cell volume was digested by a cell wall-digesting enzyme  
336 solution [0.4 M mannitol, 20 mM MES (pH 5.7), 20 mM KCl, 10 mM CaCl<sub>2</sub>, 1% (w/v) bovine  
337 serum albumin (BSA), 5 mM  $\beta$ -mercaptoethanol, 4.4% (v/v) Rohamet CL, 4% (v/v) Rohapect,  
338 0.6% (v/v) Rohapect UF] in the dark at room temperature for 2 h with gentle shaking. After two  
339 washes with wash buffer [0.45 M mannitol, 10 mM CaCl<sub>2</sub>] protoplasts were filtered through a  
340 40  $\mu$ m nylon mesh cell strainer (Fisher Scientific, Hampton, NH) and intact cells were purified  
341 using a 23% sucrose gradient centrifugation. Protoplasts were then suspended in a MMg solution  
342 [0.4 M mannitol, 15 mM MgCl<sub>2</sub>, 4 mM MES] to a concentration of 2 x 10<sup>5</sup> protoplasts/ml.  
343 For protoplast transfection assay, PEG-mediated transfection was conducted according to Yoo et  
344 al. (2007)<sup>31</sup> with modification. Ten microliters of plasmid (1  $\mu$ g/ $\mu$ l) was added to 100  $\mu$ l of  
345 protoplast suspension. After adding 110  $\mu$ l of 40% PEG solution [40% (w/v) PEG-4000 (Sigma),  
346 0.8 M mannitol, 1 M CaCl<sub>2</sub>], the mixture was incubated for 15 min at room temperature. The  
347 reaction was stopped by adding 440  $\mu$ l of W5 solution [2 mM MES, 154 mM NaCl, 125 mM  
348 CaCl<sub>2</sub>, 5 mM KCl] and the protoplasts were centrifuged at 100 x g for 1 min, and then  
349 suspended in 200  $\mu$ l of WI solution [0.5 M mannitol, 4 mM MES, 20 mM KCl] for incubation in  
350 the dark for 48 h.

351 Transformed protoplasts were observed for GFP expression using an EVOS M7000  
352 imaging system (ThermoFisher Scientific) equipped with a GFP filter (excitation 470/22 nm,  
353 emission 510/42 nm).

354  
355 **Plant stand.** A custom plant stand (“FILP’s castle”) to secure potted plants being imaged in the  
356 laser range was fabricated using 3D printing. The stand tilts potted plant samples 75 degrees  
357 forward to allow for maximum foliar exposure while using the laser system. The stand

358 accommodates three square (7.6 cm) pots that are grown in an 18 cell flat (59-3080, Griffin  
359 Greenhouse Supplies, Inc., Tewksbury, MA). Designs for 3D printing are available upon request.  
360 The face piece for plant stand was printed on a Lulzbot Taz 3D printer using nGen Copolyester  
361 with 30% infill. To create the PVC support stand, PVC pipe with approximately 22.23 mm outer  
362 diameter was cut into three 15.24 cm pieces and two 7.62 cm pieces. The weighted end piece  
363 was created by fitting each of the 7.62 cm pieces of PVC tubing into an PVC elbow and joining  
364 them in the center using a tee piece. After orienting the openings in the same direction, they were  
365 secured in place by silicone adhesive. This piece was then filled with sand and plugged by  
366 additional silicone. The weighted end piece was then attached to the openings on the back of the  
367 3D printed face using the remaining 15.24 cm PVC pieces.

368

### 369 **Data Availability**

370 Original or processed .tif image files for all FILP and confocal experiments are available from  
371 the corresponding authors upon request.

372

### 373 **Bibliography**

- 374 1 Araus, J.L., Kefauver, S.C., Zaman-Allah, M., Olsen, M.S. & Cairns, J.E. Translating  
375 High-Throughput Phenotyping into Genetic Gain. *Trends Plant Sci* **23**, 451-466. (2018).
- 376 2 Stewart, C. N., Jr. Monitoring transgenic plants using in vivo markers. *Nat Biotechnol* **14**,  
377 682-682. (1996).
- 378 3 Ckurshumova, W., Caragea, A.E., Goldstein, R. S. & Berleth, T. Glow in the dark:  
379 fluorescent proteins as cell and tissue-specific markers in plants. *Mol Plant* **4**, 794-804.  
380 (2011).
- 381 4 Lambert, T.J. FPbase: a community-editable fluorescent protein database. *Nat Methods*  
382 **16**, 277-278. (2019).
- 383 5 Stewart, C.N., Jr. Go with the glow: fluorescent proteins to light transgenic organisms.  
384 *Trends Biotechnol* **24**, 155-162. (2006).
- 385 6 Houle, D., Govindaraju, D.R. & Omholt, S. Phenomics: the next challenge. *Nat Rev*  
386 *Genet* **11**, 855-866. (2010).
- 387 7 Tardieu, F., Cabrera-Bosquet, L., Pridmore, T. & Bennett, M. Plant Phenomics, From  
388 Sensors to Knowledge. *Curr Biol* **27**, R770-R783. (2017).

- 389 8 Mylle, E., Codreanu, M., Boruc, J. & Russinova, E. Emission spectra profiling of  
390 fluorescent proteins in living plant cells. *Plant Methods* **9**, (2013).
- 391 9 Mulla, D. J. Twenty five years of remote sensing in precision agriculture: Key advances  
392 and remaining knowledge gaps. *Biosys Eng* **114**, 358-371. (2013).
- 393 10 Stewart, C.N., Jr. *et al.* Laser-induced fluorescence imaging and spectroscopy of GFP  
394 transgenic plants. *J Fluoresc* **15**, 697-705. (2005).
- 395 11 Talamond, P., Verdeil, J.L. & Conejero, G. Secondary metabolite localization by  
396 autofluorescence in living plant cells. *Molecules* **20**, 5024-5037. (2015).
- 397 12 Harper, B.K. *et al.* Green fluorescent protein as a marker for expression of a second gene  
398 in transgenic plants. *Nat Biotechnol* **17**, 5. (1999).
- 399 13 Chin, D.P. *et al.* Generation of brilliant green fluorescent petunia plants by using a new  
400 and potent fluorescent protein transgene. *Sci Rep* **8**, 16556. (2018).
- 401 14 Baker, S.S. *et al.* An epifluorescent attachment improves whole-plant digital photography  
402 of *Arabidopsis thaliana* expressing red-shifted green fluorescent protein. *AoB Plants*,  
403 pls003. (2012).
- 404 15 DiBenedetto, J., Capelle, G. A. & O'Neill, M. Time-resolved hyperspectral fluorescence  
405 spectroscopy using frequency-modulated excitation. *J Appl Phys* **112**, 013109. (2012).
- 406 16 Trainham, R., O'Neill, M. & McKenna, I. J. An Analog Filter Approach to Frequency  
407 Domain Fluorescence Spectroscopy. *J Fluoresc* **25**, 1801-1812, (2015).
- 408 17 Curtis, M. . & Grossniklaus, U.A gateway cloning vector set for high-throughput  
409 functional analysis of genes in planta. *Plant Physiol* **133**, 462-469. (2003).
- 410 18 Gadella Jr., T.W.J., van der Krogt, G.N.M. & Bisseling, T. GFP-based FRET microscopy  
411 in living plant cells. *Trends Plant Sci* **4**, 287 – 291. (1999).
- 412 19 Stewart, C.N., Jr. Monitoring the presence and expression of transgenes in living plants.  
413 *Trends Plant Sci* **10**, 390-396. (2005).
- 414 20 Fethe, M.H. *et al.* The performance of pathogenic bacterial phytosensing transgenic  
415 tobacco in the field. *Plant Biotechnol J* **12**, 755-764. (2014).
- 416 21 Wurtzel, E. Revolutionizing Agriculture with Synthetic Biology. *Nat Plants* in press  
417 (2019).
- 418 22 Liu, W. & Stewart, C.N., Jr. Plant synthetic promoters and transcription factors. *Curr*  
419 *Opin Biotechnol* **37**, 36-44. (2016).



- 420 23 de Lange, O., Klavins, E. & Nemhauser, J. Synthetic genetic circuits in crop plants. *Curr*  
421 *Opin Biotechnol* **49**, 16-22. (2018).
- 422 24 Zhu, J.K. Abiotic Stress Signaling and Responses in Plants. *Cell* **167**, 313-324. (2016).
- 423 25 Rigoulot, S.B., Petzold, H.E., Williams, S.P., Brunner, A.M. & Beers, E.P. Populus  
424 trichocarpa clade A PP2C protein phosphatases: their stress-induced expression patterns,  
425 interactions in core abscisic acid signaling, and potential for regulation of growth and  
426 development. *Plant Mol Biol* **100**, 303-317. (2019).
- 427 26 Millwood, R.J., Halfhill, M.D., Harkins, D., Russotti, R. & Stewart, C.N., Jr.  
428 Instrumentation and Methodology for Quantifying GFP Fluorescence in Intact Plant  
429 Organs. *BioTechniques* **34**, 5. (2003).
- 430 27 R Core Team. R: A language and environment for statistical computing. R Foundation  
431 for Statistical Computing, (2013).
- 432 28 Chang, W., Cheng, J., Allaire, J.J., Xie, Y. & McPherson, J. shiny: Web Application  
433 Framework for R. R package version 1.3.0, (2019).
- 434 29 Schneider, C.A., Rasband, W.S. & Eliceiri, K.W. NIH Image to ImageJ: 25 years of  
435 Image Analysis. *Nat Methods* **9**, 4. (2012).
- 436 30 Sajid, Z.A. & Aftab, F. An efficient method for the establishment of cell suspension  
437 cultures in potato (*Solanum tuberosum L.*). *Pak J Bot* **48**, (2016).
- 438 31 Yoo, S.D., Cho, Y.H. & Sheen, J. Arabidopsis mesophyll protoplasts: a versatile cell  
439 system for transient gene expression analysis. *Nat Protoc* **2**, 1565-1572. (2007).
- 440 32 Subach, O.M., Cranfill, P.J., Davidson, M.W. & Verkhusha, V.V. An enhanced  
441 monomeric blue fluorescent protein with the high chemical stability of the chromophore.  
442 *PLoS One* **6**, 28674. (2011).
- 443 33 Goedhart, J. *et al.* Bright cyan fluorescent protein variants identified by fluorescence  
444 lifetime screening. *Nat Methods* **7**, 137-139. (2010).
- 445 34 Cubitt, A.B., Woollenweber, L.A. & Heim, R. Chapter 2: Understanding Structure—  
446 Function Relationships in the *Aequorea victoria* Green Fluorescent Protein. *Methods Cell*  
447 *Biol* **58**, 19-30. (1998).
- 448 35 Ai, H.W., Hazelwood, K.L., Davidson, M.W. & Campbell, R.E. Fluorescent protein  
449 FRET pairs for ratiometric imaging of dual biosensors. *Nat Methods* **5**, 401-403. (2008).



- 450 36 Lam, A. J. *et al.* Improving FRET dynamic range with bright green and red fluorescent  
451 proteins. *Nat Methods* **9**, 1005-1012. (2012).
- 452 37 Kremers, G., Goedhart, J., Van Munster, E.B. & Gadella, J., T.W.J. Cyan and Yellow  
453 Super Fluorescent Proteins with Improved Brightness, Protein Folding, and FRET  
454 Förster Radius. *Biochemistry* **52**, 11. (2006).
- 455 38 Nguyen, A.W. & Daugherty, P. S. Evolutionary optimization of fluorescent proteins for  
456 intracellular FRET. *Nat Biotechnol* **23**, 355-360. (2005).
- 457 39 Shagin, D.A. *et al.* GFP-like proteins as ubiquitous metazoan superfamily: evolution of  
458 functional features and structural complexity. *Mol Biol Evol* **21**, 841-850. (2004).
- 459 40 Shaner, N.C. *et al.* Improved monomeric red, orange and yellow fluorescent proteins  
460 derived from *Discosoma sp.* red fluorescent protein. *Nat Biotechnol* **22**, 1567-1572.  
461 (2004).
- 462 41 Sakaue-Sawano, A. *et al.* Visualizing spatiotemporal dynamics of multicellular cell-cycle  
463 progression. *Cell* **132**, 487-498. (2008).
- 464 42 Shcherbakova, D.M., Hink, M.A., Joosen, L., Gadella, T.W. & Verkhusha, V.V. An  
465 orange fluorescent protein with a large Stokes shift for single-excitation multicolor FCCS  
466 and FRET imaging. *J Am Chem Soc* **134**, 7913-7923. (2012).
- 467 43 Merzlyak, E.M. *et al.* Bright monomeric red fluorescent protein with an extended  
468 fluorescence lifetime. *Nat Methods* **4**, 555-557. (2007).
- 469 44 Bindels, D.S. *et al.* mScarlet: a bright monomeric red fluorescent protein for cellular  
470 imaging. *Nat Methods* **14**, 53-56. (2017).
- 471 45 Bajar, B.T. *et al.* Improving brightness and photostability of green and red fluorescent  
472 proteins for live cell imaging and FRET reporting. *Sci Rep* **6**, 20889. (2016).
- 473 46 Alieva, N.O. *et al.* Diversity and evolution of coral fluorescent proteins. *PLoS One* **3**,  
474 e2680. (2008).
- 475 47 Yang, J. *et al.* mBeRFP, an improved large stokes shift red fluorescent protein. *PLoS One*  
476 **8**, 64849. (2013).

477

478 **Figure 1. Fluorescence-inducing laser projector (FILP) characteristics. (a)** Photograph of  
479 FILP system breadboard. **(b)** Schematic illustrating the setup of components. Abbreviations:  
480 Thermo-electric cooler (TEC); amplified spontaneous emission (ASE) **(c)** Combined line and

481 area plot. Line plots show the wavelengths covered by the 460/50 nm, 525/50 nm, 575/40 nm  
482 and 645/75 nm notch filters, in which the first numeral is the center point and the second numeral  
483 is the breadth of the notch filter. The line plot also includes area plots which indicate the auto-  
484 fluorescence emission by chlorophylls A (excitation 614 nm) and B (excitation 435 nm) in  
485 diethyl ether.

486  
487 **Table 1. Fluorescent proteins produced in plants.** Abbreviations: excitation  $\lambda$  (Ex), emission  $\lambda$   
488 (Em); extinction coefficient (EC); quantum yield (QY); relative brightness (RB). \* indicates that  
489 the EC, QY and RB data was taken from avGFP, the wild-type GFP. *Text color for mTagBFP2*  
490 *and mTurquoise was changed to white to facilitate ease of reading.*

491  
492 **Figure 2.** Top performing fluorescent proteins. **a)** Bars along the left side of the figure indicate  
493 which laser diode was used for excitation of each FP while the emission filter corresponds to the  
494 emission peak in the fluorolog readings. FILP images indicate laser power used in the bottom left  
495 of fluorescent images. **b)** FILP images depict four combinations using the top performing  
496 fluorescent proteins. Brightfield images for each of the combinations indicates the placement of  
497 the three plants with a circled number: 1) vacuum co-infiltrated, 2) syringe infiltrated individual  
498 FPs and 3) Buffer control. Buffer control is the same for all four combinations. Images for FILP  
499 were acquired sequentially. Laser diode and emission filter combinations are the same as those  
500 used for acquisition of single FPs. Laser power for each can be found in Supplementary Figure 2.  
501 Exposure time for FILP images was 150 ms. Scale bars for FILP images represent 2.5 cm at a  
502 detection distance of 3 m while scale bars for confocal images represent 50  $\mu$ m.

503  
504 **Figure 3. Osmotic stress-inducible promoter.** **(a)** A short, synthetic promoter, 'JL1,' was  
505 found to be induced by osmotica in transfected protoplasts derived from a potato cell suspension  
506 culture screen based on expression of a GFP reporter. **(b)** Line plots showing fluorescence  
507 intensity measurements of the osmotic stress-inducible construct for each of the three  
508 agroinfiltrated leaves of *N. benthamiana*: leaf 1 (L1), leaf 2 (L2) and leaf 3 (L3). Error bars  
509 represent the standard deviation across four biological replicates. **(c)** FILP images of JL1  
510 infiltrated plants 5 days post-treatment. Scale bars for FILP images represent 2.5 cm at a

511 detection distance of 3 m. Brightfield images indicate leaf placement for each of the three  
512 treatments, buffer (black), mock (green) and salt (red), <sup>1</sup>Leaf 1, <sup>2</sup>Leaf 2 and <sup>3</sup>Leaf 3.

513

514 **Supplementary Figure 1. Fluorescent proteins successfully observed by the FILP system.**

515 Fluorescence spectroscopy measurements and confocal imaging included for verification.  
516 Exposure time for FILP imaging can be seen in Supplementary Table 1. Y-axis for all plots is  
517 scaled to  $5 \times 10^5$  CPS except for PhiYFP which is scaled to  $1.0 \times 10^6$  CPS. Scale bars for FILP  
518 images represent 2.5 cm at a detection distance of 3 m while scale bars for confocal images  
519 represent 50  $\mu\text{m}$ .

520

521 **Supplementary Table 1. Heatmap of laser power required for the detection of fluorescent**  
522 **proteins.** Laser diode power and emission filter combinations are scored from no signal (none)  
523 to the highest signal to noise ratio. Heatmap of fluorescence spectroscopy measurements show  
524 fluorescence when compared to buffer infiltrated control at each fluorescent protein peak  
525 emission at 400 nm, 465 nm, and 524 nm excitation wavelengths. Diagonal line fill indicates that  
526 the excitation wavelengths exceed the reported peak emission value and therefore the  
527 fluorescence intensity for the peak emission cannot be calculated. Data acquired for this figure  
528 and Supplementary Figure 1 used an earlier version of  $\mu\text{Manager}$ , which did not support the full  
529 capabilities of the Andor camera. As such, a higher laser voltage was required to collect this  
530 data, when compared to the data collected in the main text with a newer version of  $\mu\text{Manager}$ .

531

532 **Supplementary Figure 2. Fluorescence spectroscopy measurements of co-expressed**  
533 **fluorescent proteins.** Individual channels of co-expressed FPs for combinations described in  
534 Figure 2. Exposure time for FILP images was 150 ms. Line plots correspond to fluorescence  
535 emission measurements taken on vacuum co-infiltrated plants. Black lines designate the buffer  
536 control plant reading for the 1<sup>st</sup> FP and the buffer for the 2<sup>nd</sup> FP is in grey. Scale bars for FILP  
537 images represent 2.5 cm at a detection distance of 3 m.

538

539 **Supplementary Figure 3. Current vs. laser power.** Controlled by the Necsel Intelligent  
540 Controller.

541

542 **Supplementary Figure 4. Determination and application of image color. (a)** Screenshot of  
543 the Wolfram Player Colors of the Visible Spectrum plugin for mEmerald peak emission (509)  
544 and the formula for the conversion of the Wolfram Player Value (WPV) to red (R), green (G) or  
545 blue (B) intensity values. **(b)** Fluorescent protein table that contains peak emission values and the  
546 RGB intensity values used to establish the look up tables for pseudo color imaging. **(c)** Example  
547 of image processing using the ImageJ software and the application of pseudo color to a FILP  
548 image. Includes a screenshot of the ImageJ LUT editor. The example given is the mEmerald  
549 image used for the production of Figure 2.

550

### 551 **Acknowledgements**

552 Special thanks to all members of the Center for Agricultural Synthetic Biology at the University  
553 of Tennessee for their support as well as lab members Lezlee Dice, Taylor Frazier-Douglas,  
554 Cassie Halvorsen, Li Li, Mitra Mazarei, Reginald Millwood, Mary-Anne Nguyen, Alex  
555 Pfoetenhour, Christiano Piasecki, Rebekah Rogers, Yuanhua Shao, Shamira Sultana, and Yongil  
556 Yang. We sincerely appreciate the assistance from Richard Sexton and Vilmos Magda at the  
557 University of Tennessee Pendergrass library with the 3D printing of the custom plant stand.

558

559 This research was developed with funding from the Defense Advanced Research Projects  
560 Agency (DARPA) Award No. HR0011-18-2-0049 and Department of Energy (DOE) Grant No.  
561 DESC0018347. The views, opinions and/or findings expressed are those of the authors and  
562 should not be interpreted as representing the official views or policies of the Department of  
563 Defense or the U.S. Government.

564

### 565 **Author Contributions**

566 **CNS, JDB, SCL, TMS, and SBR** conceived of the research. **JDB, JAM, MJF, SCL, TMS,** and  
567 **CNS** played roles in designing and building the FILP instrument. **SBR, TMS, JHL, SCL,** and  
568 **CNS** wrote and prepared the manuscript. **SBR, KAM, HB** and **JHL** were responsible for the  
569 organization of figures. **SBR, TMS, JHL, HB, MJS, KAM, MRP, JSL, MJS, AO, SCL** and  
570 **EMS** were responsible for the design and construction of all constructs tested, plant care, potato  
571 cell culture, protoplast assays, agroinfiltration experiments, confocal microscopy, and FILP  
572 imaging and spectroscopy. **MJS** and **SBR** developed the agroinfiltration apparatus and produced

573 the Supplementary video. **HB** and **JWB** were responsible for the conception and writing of the  
574 Fluorologger software. **SBR** and **KAM** designed the custom plant stand.

575

576 **Competing interests**

577 The authors declare competing interests.

578 **Corresponding authors**

579 Correspondence and requests for materials should be addressed to Scott C. Lenaghan and C.

580 Neal Stewart, Jr.

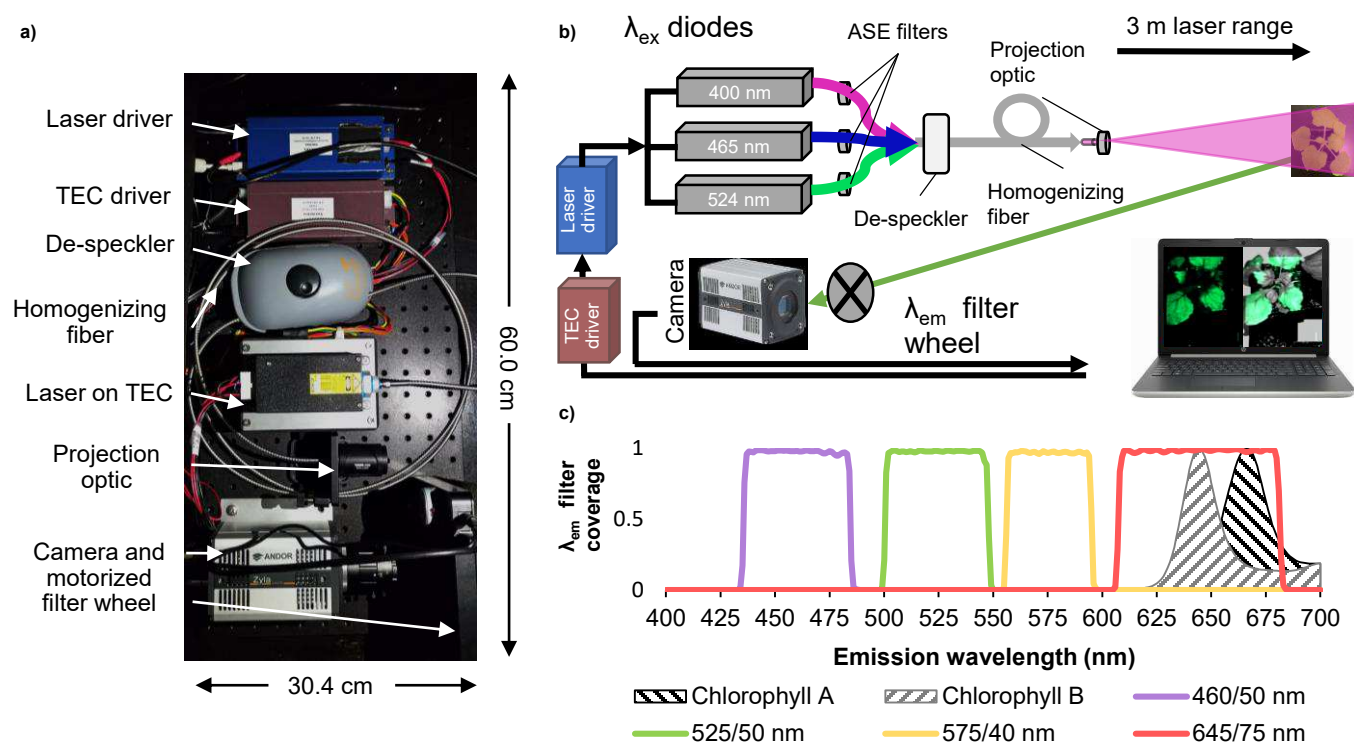

**Figure 1. Fluorescence-inducing laser projector (FILP) characteristics.** **(a)** Photograph of FILP system breadboard. **(b)** Schematic illustrating the setup of components. Abbreviations: Thermo-electric cooler (TEC); amplified spontaneous emission (ASE) **(c)** Combined line and area plot. Line plots show the wavelengths covered by the 460/50 nm, 525/50 nm, 575/40 nm and 645/75 nm notch filters, in which the first numeral is the center point and the second numeral is the breadth of the notch filter. The line plot also includes area plots which indicate the auto-fluorescence emission by chlorophylls A (excitation 614 nm) and B (excitation 435 nm) in diethyl ether.

**Table 1. Fluorescent proteins produced in plants.** Abbreviations: excitation  $\lambda$  (Ex), emission  $\lambda$  (Em); extinction coefficient (EC); quantum yield (QY); relative brightness (RB). \* indicates that the EC, QY and RB data was taken from avGFP, the wild-type GFP. *Text color for mTagBFP2 and mTurquoise was changed to white to facilitate ease of reading.*

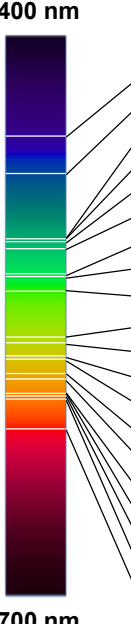

| Fluorescent protein | Donor organism                | Oligomerization | Ex (nm) | Em (nm) | EC ( $M^{-1}cm^{-1}$ ) | QY  | RB   | Primary reference |
|---------------------|-------------------------------|-----------------|---------|---------|------------------------|-----|------|-------------------|
| mTagBFP2            | <i>Entacmaea quadricolor</i>  | Monomer         | 399     | 454     | 50,600                 | 0.6 | 32.4 | (32)              |
| mTurquoise          | <i>Aequorea victoria</i>      | Monomer         | 434     | 474     | 30,000                 | 0.8 | 25.2 | (33)              |
| mGFP5ER*            | <i>Aequorea victoria</i>      | Monomer         | 395/473 | 509     | 25,000                 | 0.8 | 19.8 | (11)              |
| mEmerald            | <i>Aequorea victoria</i>      | Monomer         | 487     | 509     | 57,500                 | 0.7 | 39.1 | (34)              |
| mT-sapphire         | <i>Aequorea victoria</i>      | Monomer         | 399     | 511     | 44,000                 | 0.6 | 26.4 | (35)              |
| Clover              | <i>Aequorea victoria</i>      | Dimer           | 505     | 515     | 111,000                | 0.8 | 84.4 | (36)              |
| mVenus              | <i>Aequorea victoria</i>      | Monomer         | 515     | 527     | 104,000                | 0.6 | 66.6 | (37)              |
| YPet                | <i>Aequorea victoria</i>      | Dimer           | 517     | 530     | 104,000                | 0.8 | 80.0 | (38)              |
| PhiYFP              | <i>Phialidium sp.</i>         | Dimer           | 525     | 537     | 115,000                | 0.6 | 69.0 | (39)              |
| mOrange-ER          | <i>Discosoma sp.</i>          | Monomer         | 548     | 562     | 71,000                 | 0.7 | 49.0 | (40)              |
| mKO2                | <i>Verrillfungia concinna</i> | Monomer         | 551     | 565     | 63,800                 | 0.6 | 39.6 | (41)              |
| LSS-mOrange         | <i>Discosoma sp.</i>          | Monomer         | 437     | 572     | 52,000                 | 0.5 | 23.4 | (42)              |
| TurboRFP            | <i>Entacmaea quadricolor</i>  | Dimer           | 553     | 574     | 92,000                 | 0.7 | 61.6 | (43)              |
| tdTomatoER          | <i>Discosoma sp.</i>          | Tandem Dimer    | 554     | 581     | 138,000                | 0.7 | 95.2 | (40)              |
| TagRFP              | <i>Entacmaea quadricolor</i>  | Dimer           | 555     | 584     | 100,000                | 0.5 | 48.0 | (43)              |
| mScarlet-H          | Synthetic construct           | Monomer         | 551     | 592     | 74,000                 | 0.2 | 14.8 | (44)              |
| mRuby3              | <i>Entacmaea quadricolor</i>  | Monomer         | 558     | 592     | 128,000                | 0.5 | 57.6 | (45)              |
| mScarlet-I          | Synthetic construct           | Monomer         | 569     | 593     | 104,000                | 0.5 | 56.2 | (44)              |
| pporRFP             | <i>Porites porites</i>        | Tetramer        | 578     | 595     | 54,000                 | 1.0 | 55.0 | (46)              |
| mBeRFP              | <i>Entacmaea quadricolor</i>  | Monomer         | 446     | 611     | 65,000                 | 0.3 | 17.6 | (47)              |



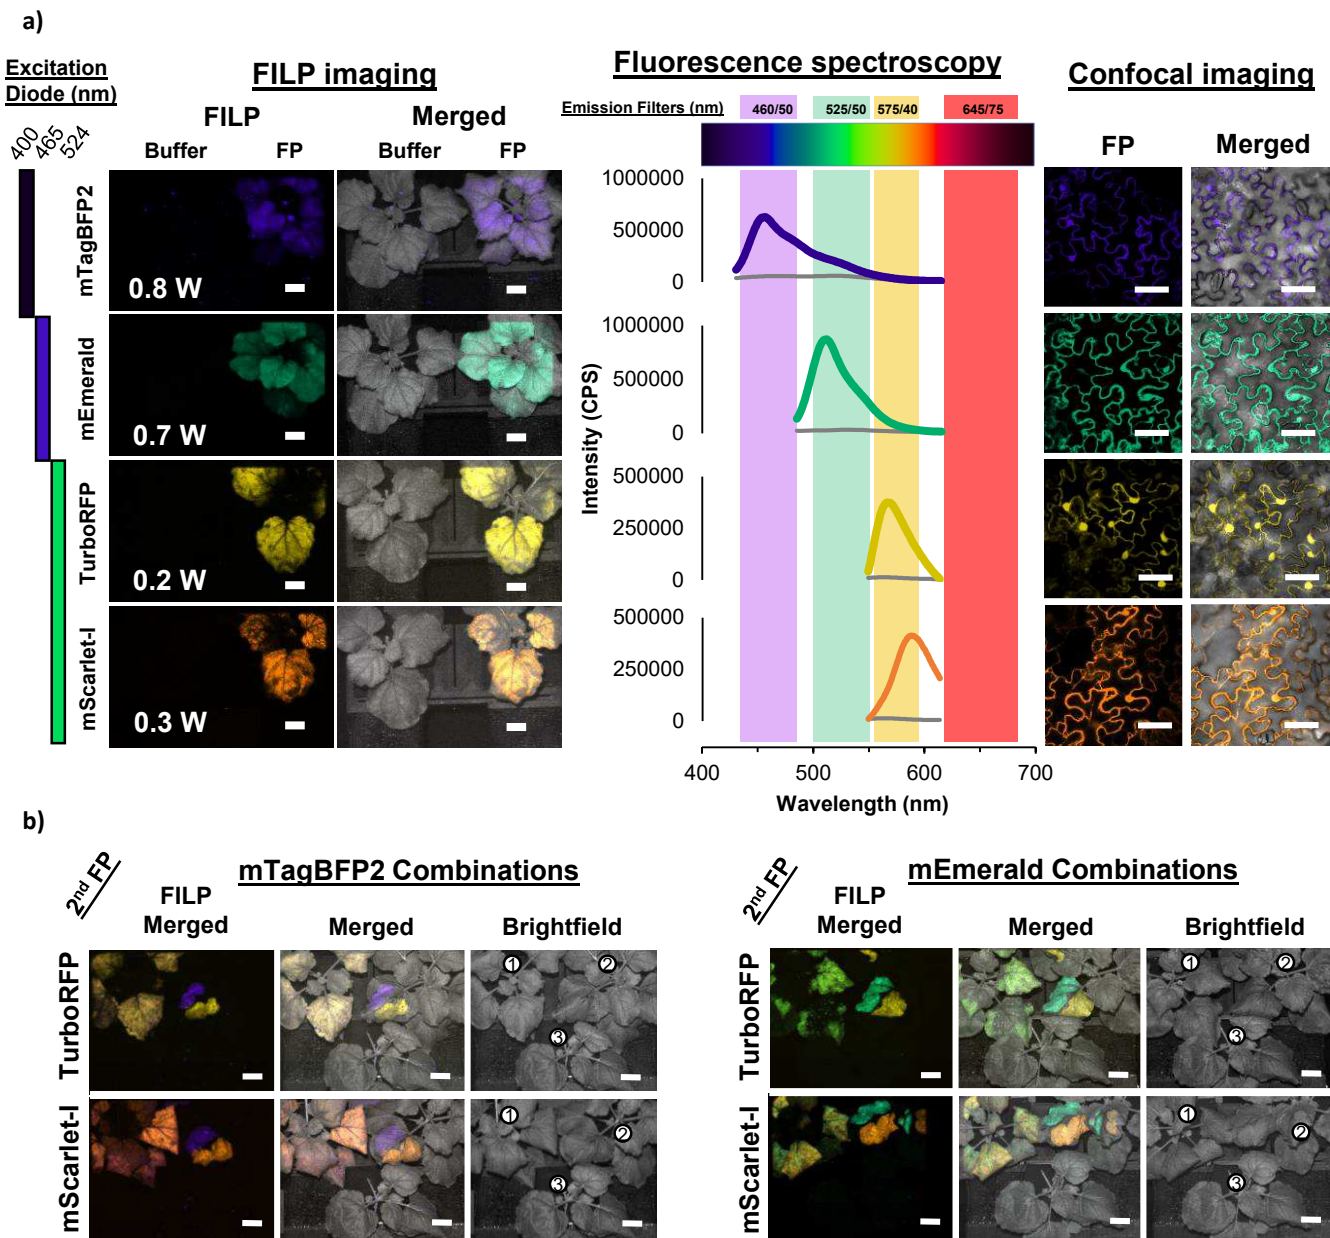

**Figure 2.** Top performing fluorescent proteins. **a)** Bars along the left side of the figure indicate which laser diode was used for excitation of each FP while the emission filter corresponds to the emission peak in the fluorolog readings. FILP images indicate laser power used in the bottom left of fluorescent images. **b)** FILP images depict four combinations using the top performing fluorescent proteins. Brightfield images for each of the combinations indicates the placement of the three plants with a circled number: 1) vacuum co-infiltrated, 2) syringe infiltrated individual FPs and 3) Buffer control. Buffer control is the same for all four combinations. Images for FILP were acquired sequentially. Laser diode and emission filter combinations are the same as those used for acquisition of single FPs. Laser power for each can be found in Supplementary Figure 2. Exposure time for FILP images was 150 ms. Scale bars for FILP images represent 2.5 cm at a detection distance of 3 m while scale bars for confocal images represent 50  $\mu$ m.

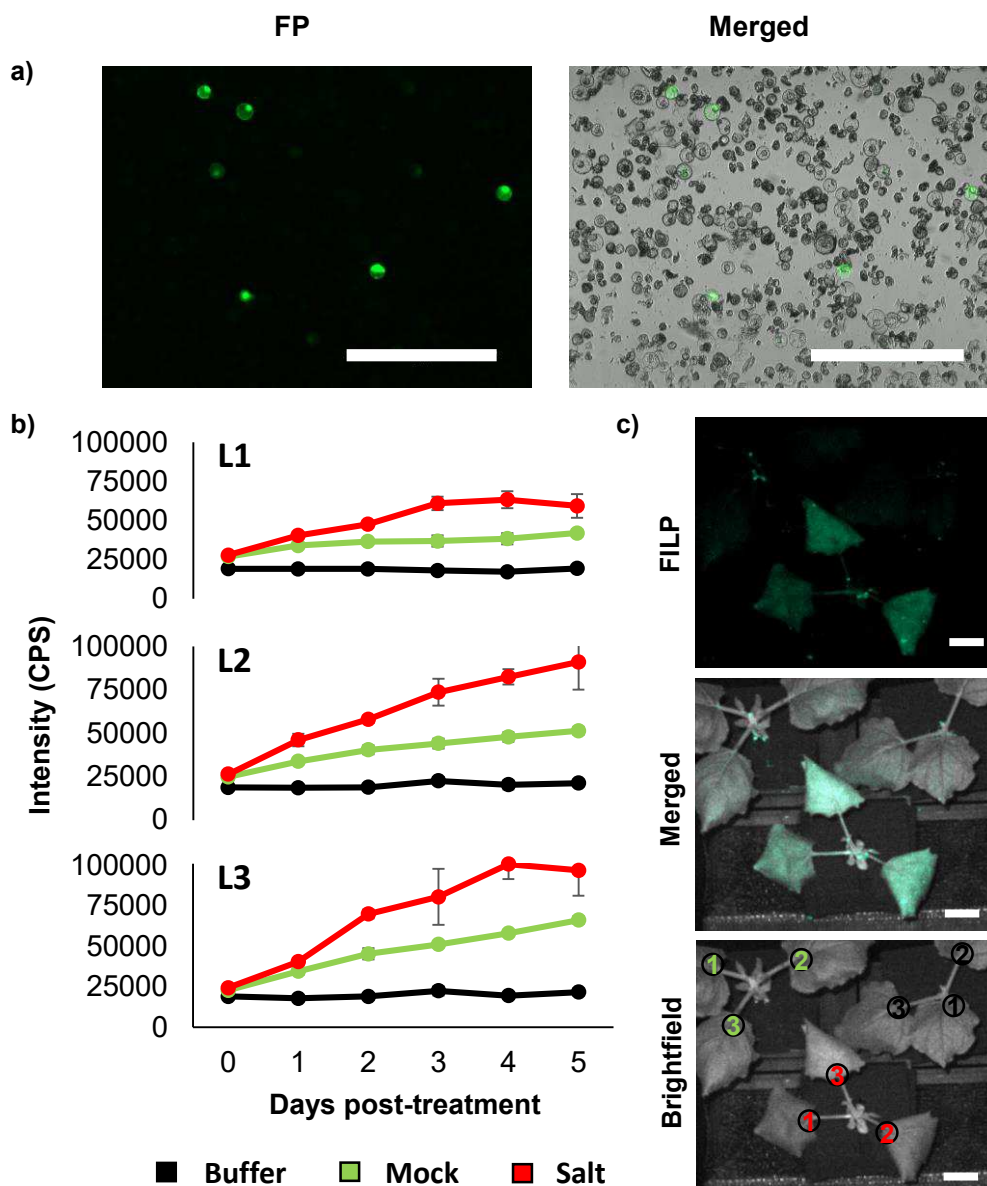

**Figure 3. Osmotic stress-inducible promoter. (a)** A short, synthetic promoter, 'JL1,' was found to be induced by osmotica in transfected protoplasts derived from a potato cell suspension culture screen based on expression of a GFP reporter. **(b)** Line plots showing fluorescence intensity measurements of the osmotic stress-inducible construct for each of the three agroinfiltrated leaves of *N. benthamiana*: leaf 1 (L1), leaf 2 (L2) and leaf 3 (L3). Error bars represent the standard deviation across four biological replicates. **(c)** FILP images of JL1 infiltrated plants 5 days post-treatment. Scale bars for FILP images represent 2.5 cm at a detection distance of 3 m. Brightfield images indicate leaf placement for each of the three treatments, buffer (black), mock (green) and salt (red), <sup>1</sup>Leaf 1, <sup>2</sup>Leaf 2 and <sup>3</sup>Leaf 3.



**400 nm ex. 525 nm em.**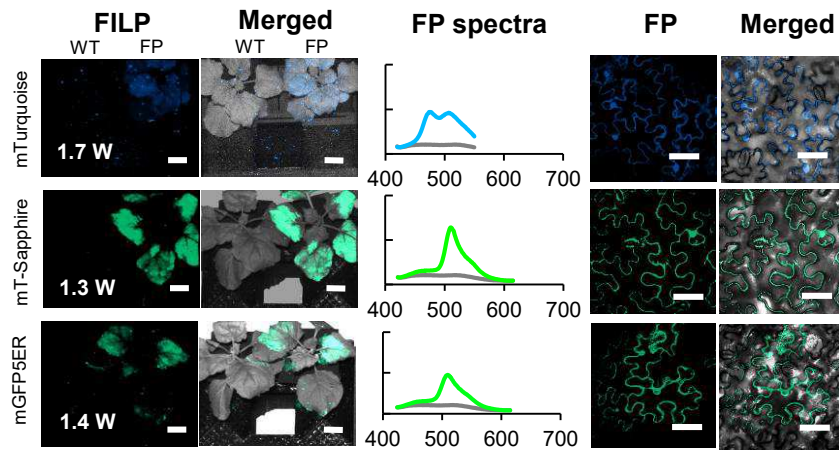**400 nm ex. 575 nm em.**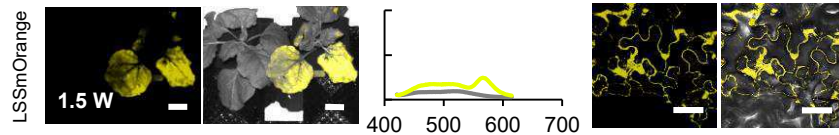**465 nm ex. 525 nm em.**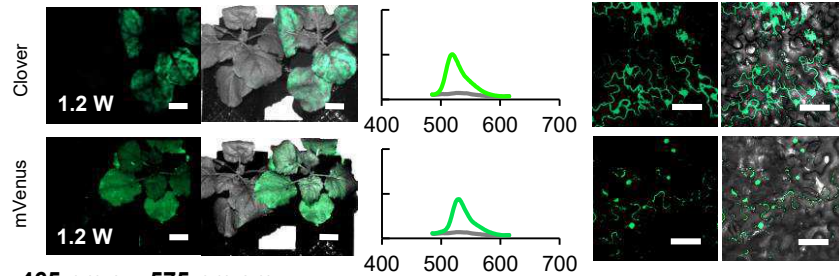**465 nm ex. 575 nm em.**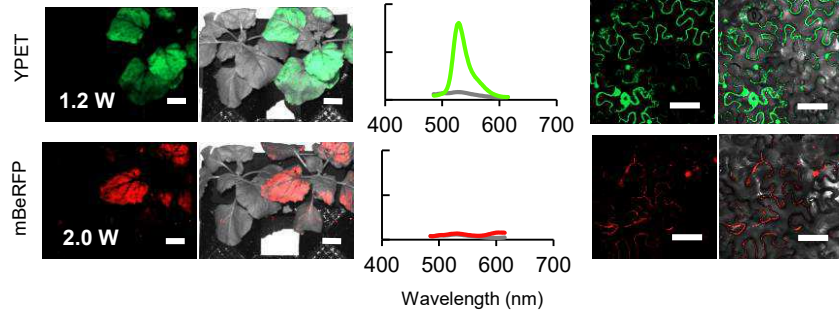**525 nm ex. 575 nm em.**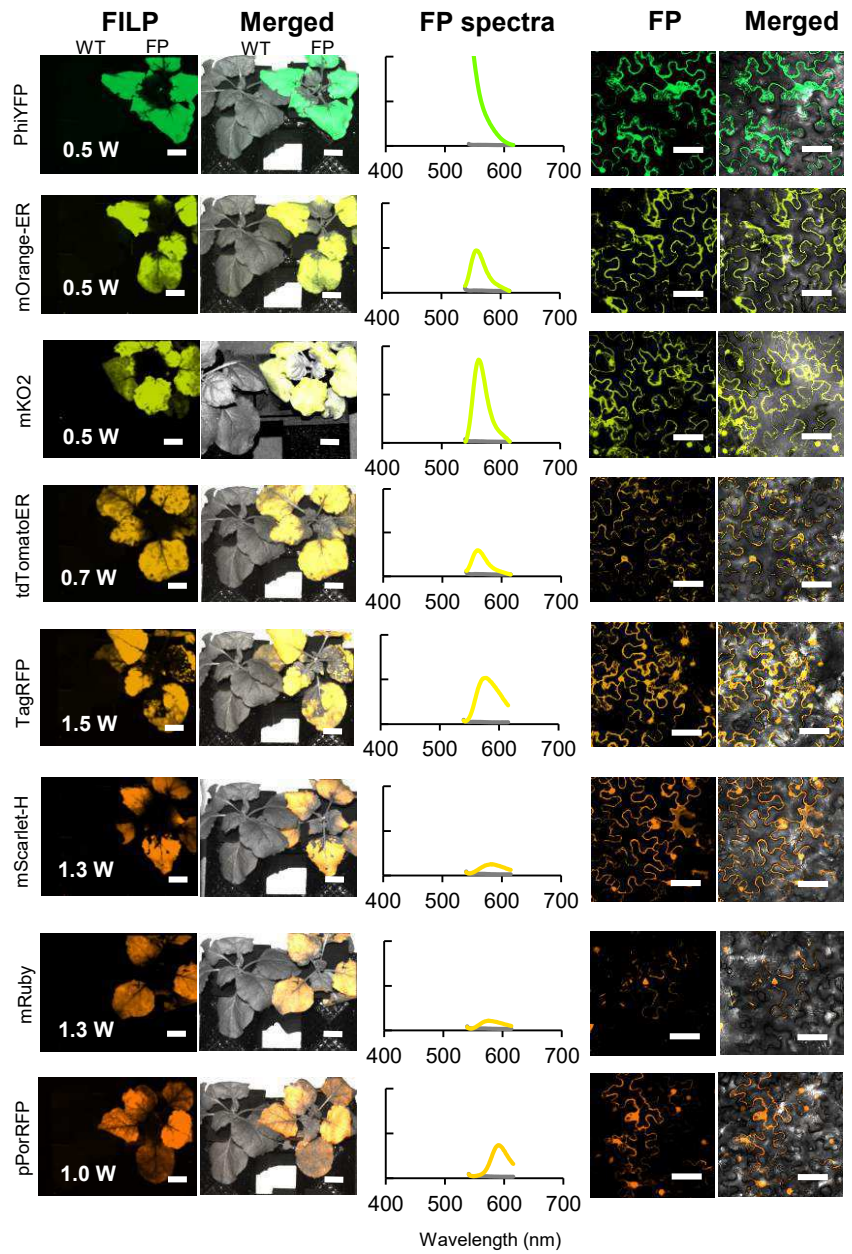

**Supplementary Figure 1. Fluorescent proteins successfully observed by the FILP system.** Fluorescence spectroscopy measurements and confocal imaging included for verification. Exposure time for FILP imaging can be seen in Supplementary Table 1. Y-axis for all plots is scaled to  $5 \times 10^5$  CPS except for PhiYFP which is scaled to  $1.0 \times 10^6$  CPS. Scale bars for FILP images represent 2.5 cm at a detection distance of 3 m while scale bars for confocal images represent 50  $\mu\text{m}$ .

|                    | Peak maxima |         |               | FILP imaging and measurements |        |        |            |        |            | Signal to noise measurements from fluorescence spectroscopy |            |            |            |
|--------------------|-------------|---------|---------------|-------------------------------|--------|--------|------------|--------|------------|-------------------------------------------------------------|------------|------------|------------|
|                    | Ex (nm)     | Em (nm) | Exposure (ms) | Ex. 400 nm                    |        |        | Ex. 465 nm |        | Ex. 524 nm |                                                             | Ex. 400 nm | Ex. 465 nm | Ex. 524 nm |
|                    |             |         |               | 460/50                        | 525/50 | 575/50 | 525/50     | 575/50 | 460/50     | 575/50                                                      |            |            |            |
| <b>mTagBFP2</b>    | 399         | 454     | 500           | 1.4 W                         | 1.4 W  |        |            |        |            |                                                             |            |            |            |
| <b>mTurquoise</b>  | 434         | 474     | 500           | 1.7 W                         | 1.7 W  | 1.7 W  | 1.4 W      | 1.4 W  |            |                                                             |            |            |            |
| <b>mGFP5er</b>     | 395         | 509     | 500           | 1.4 W                         | 1.4 W  |        |            |        |            |                                                             |            |            |            |
| <b>mEmerald</b>    | 487         | 509     | 500           | 1.4 W                         | 1.4 W  | 1.4 W  | 1.4 W      | 1.4 W  |            |                                                             |            |            |            |
| <b>mT-sapphire</b> | 399         | 511     | 500           |                               | 1.3 W  | 1.3 W  |            |        |            |                                                             |            |            |            |
| <b>Clover</b>      | 505         | 515     | 500           |                               | 1.5 W  | 1.5 W  | 1.5 W      |        |            |                                                             |            |            |            |
| <b>mVenus</b>      | 515         | 527     | 500           |                               | 1.5 W  | 1.5 W  | 1.2 W      | 1.2 W  |            |                                                             |            |            |            |
| <b>yPET</b>        | 517         | 530     | 500           |                               |        |        | 1.2 W      | 1.2 W  |            |                                                             | 0.5 W      |            |            |
| <b>PhiYFP</b>      | 525         | 537     | 500           |                               |        |        | 1.4 W      | 1.4 W  |            |                                                             | 0.5 W      |            |            |
| <b>mOrange-ER</b>  | 548         | 562     | 500           |                               | 1.4 W  | 1.4 W  |            | 2.0 W  |            |                                                             | 0.5 W      |            |            |
| <b>mKO2</b>        | 551         | 565     | 500           |                               |        |        |            |        |            |                                                             | 0.5 W      |            |            |
| <b>LSS-mOrange</b> | 437         | 572     | 500           |                               | 1.5 W  | 1.5 W  |            | 1.5 W  |            |                                                             |            |            |            |
| <b>TurboRFP</b>    | 553         | 574     | 500           |                               | 1.3 W  | 1.3 W  |            | 2.0 W  |            |                                                             | 0.5 W      |            |            |
| <b>tdTomatoER</b>  | 554         | 581     | 500           |                               | 1.8 W  |        |            | 2.0 W  |            |                                                             | 0.7 W      |            |            |
| <b>TagRFP</b>      | 555         | 584     | 200           |                               |        |        |            | 2.0 W  |            |                                                             | 1.0 W      |            |            |
| <b>mScarlet-H</b>  | 551         | 592     | 200           |                               |        |        |            |        |            |                                                             | 1.3 W      |            |            |
| <b>mRuby3</b>      | 558         | 592     | 200           |                               |        |        |            |        |            |                                                             | 1.5 W      |            |            |
| <b>mScarlet-I</b>  | 569         | 593     | 200           |                               |        |        |            | 1.5 W  |            |                                                             | 0.5 W      |            |            |
| <b>pporRFP</b>     | 578         | 595     | 200           |                               |        |        |            | 1.5 W  |            |                                                             | 1.0 W      |            |            |
| <b>mBeRFP</b>      | 446         | 611     | 200           |                               |        |        |            | 2.0 W  |            |                                                             |            |            |            |

  

| Signal to noise ratio |     |        | Log2 Fold-change |           |         |
|-----------------------|-----|--------|------------------|-----------|---------|
| None                  | Low | Medium | High             | No Change | Highest |
|                       |     |        |                  |           |         |

**Supplementary Table 1. Heatmap of laser power required for the detection of fluorescent proteins.** Laser diode power and emission filter combinations are scored from no signal (none) to the highest signal to noise ratio. Heatmap of fluorescence spectroscopy measurements show fluorescence when compared to buffer infiltrated control at each fluorescent protein peak emission at 400 nm, 465 nm, and 524 nm excitation wavelengths. Diagonal line fill indicates that the excitation wavelengths exceeded the reported peak emission value and therefore the fluorescence intensity for the peak emission cannot be calculated. Data acquired for this figure and Supplementary Figure 1 used an earlier version of  $\mu$ Manager, which did not support the full capabilities of the Andor camera. As such, a higher laser voltage was required to collect this data, when compared to the data collected in the main text with a newer version of  $\mu$ Manager.

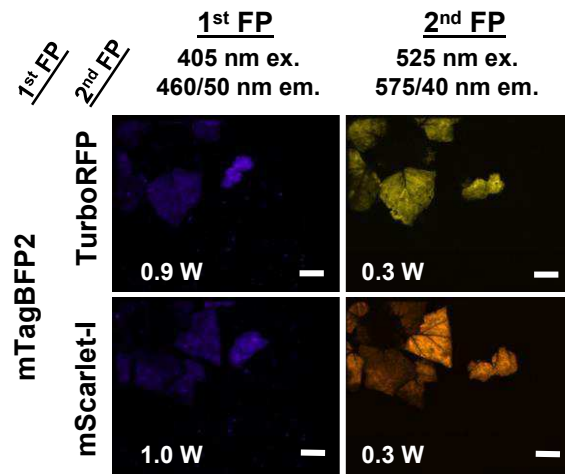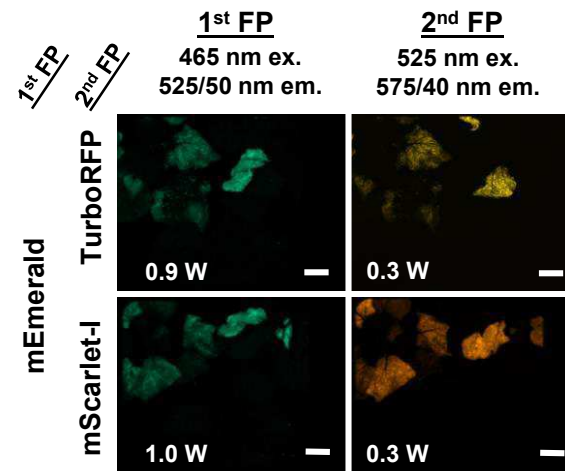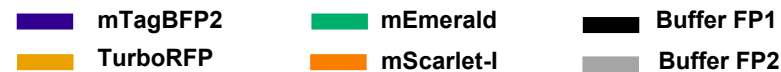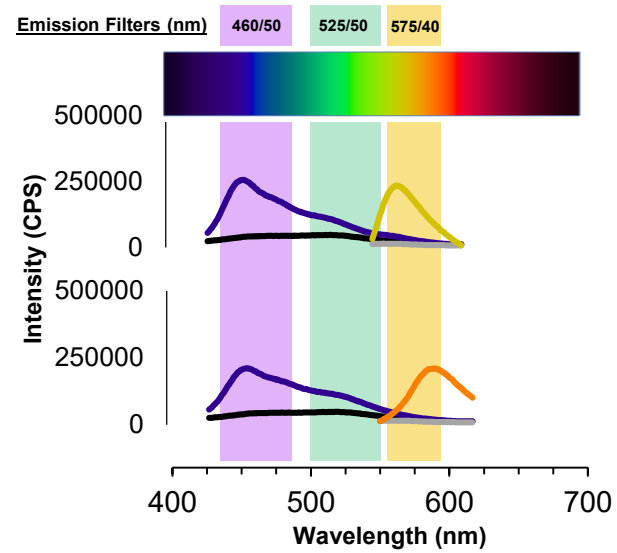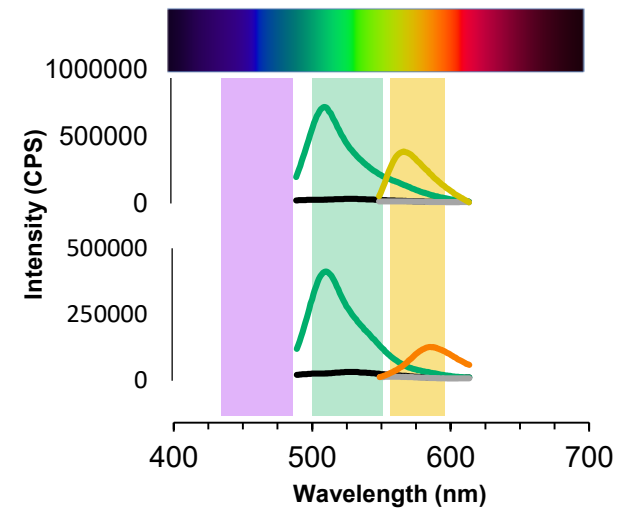

**Supplementary Figure 2. Fluorescence spectroscopy measurements of co-expressed fluorescent proteins.** Individual channels of co-expressed FPs for combinations described in Figure 2. Exposure time for FILP images was 150 ms. Line plots correspond to fluorescence emission measurements taken on vacuum co-infiltrated plants. Black lines designate the buffer control plant reading for the 1<sup>st</sup> FP and the buffer for the 2<sup>nd</sup> FP is in grey. Scale bars for FILP images represent 2.5 cm at a detection distance of 3 m.

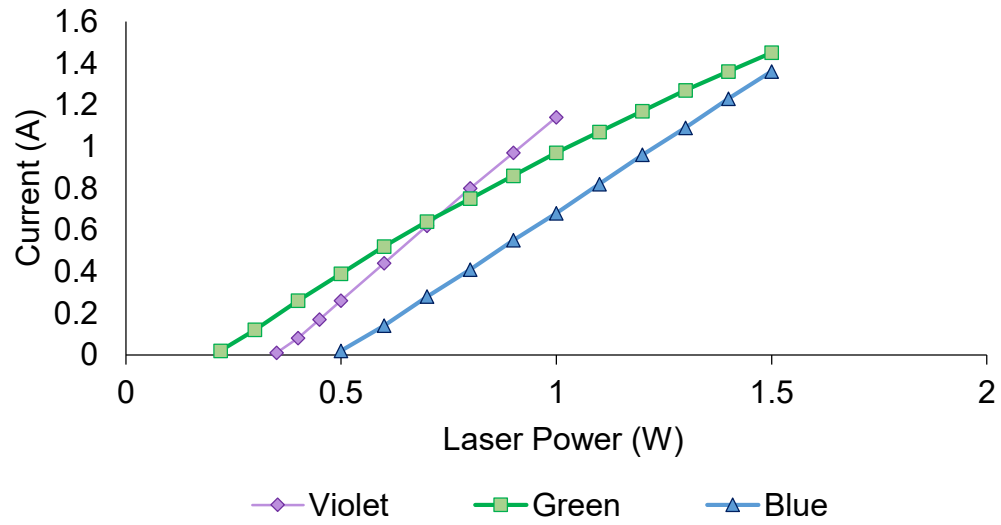

**Supplementary Figure 3. Current vs. laser power.** Controlled by the Necsel Intelligent Controller.

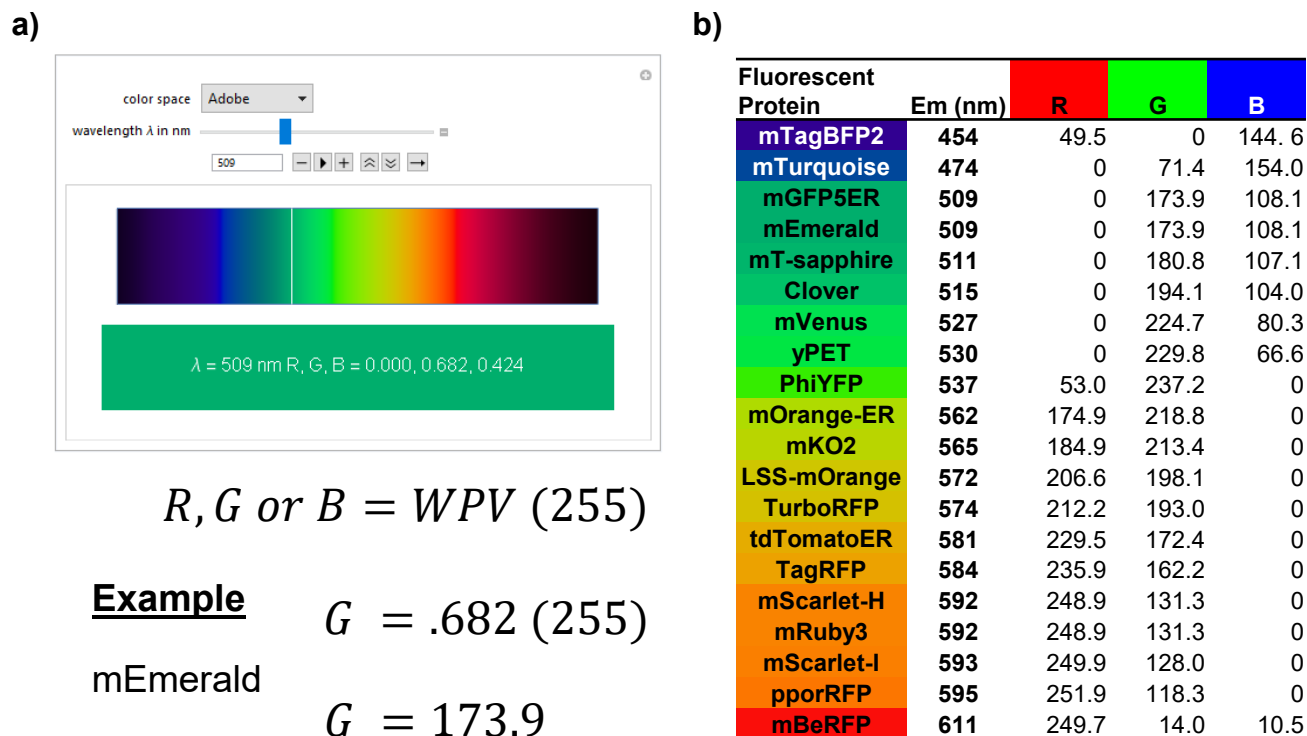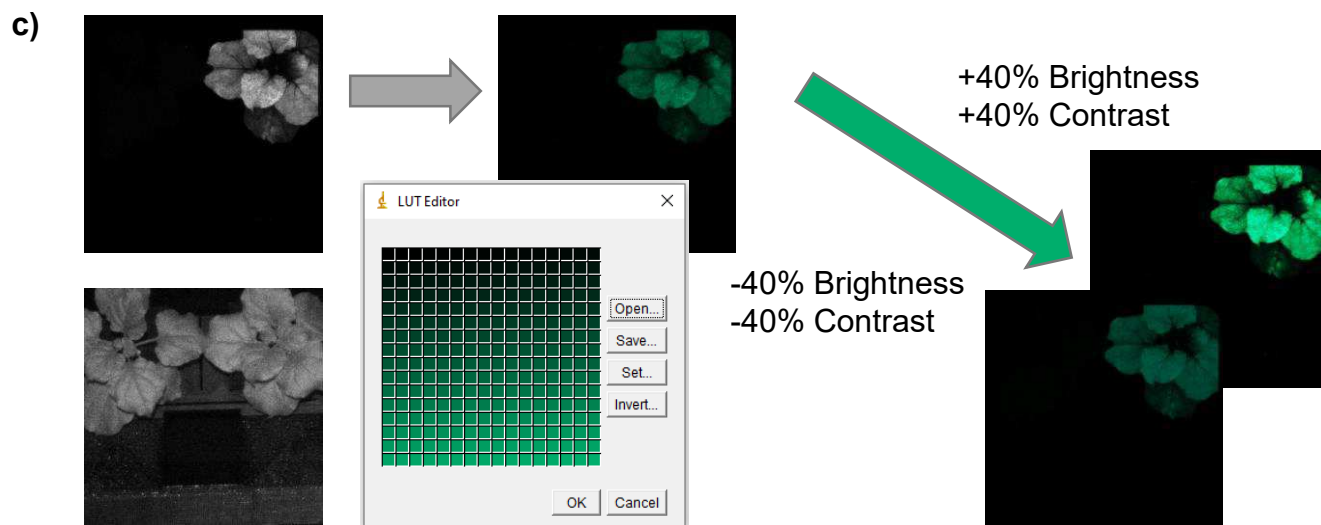

**Supplementary Figure 4. Determination and application of image color.** (a) Screenshot of the Wolfram Player Colors of the Visible Spectrum plugin for mEmerald peak emission (509) and the formula for the conversion of the Wolfram Player Value (WPV) to red (R), green (G) or blue (B) intensity values. (b) Fluorescent protein table that contains peak emission values and the RGB intensity values used to establish the look up tables for pseudo color imaging. (c) Example of image processing using the ImageJ software and the application of pseudo color to a FILP image. Includes a screenshot of the ImageJ LUT editor. The example given is the mEmerald image used for the production of Figure 2.
